# Supplementary material for: Synchronous dual additives to boost multiphase interface stability of high-voltage Li-rich Mn-based batteries
Source: Royal Society of Chemistry journal article supplement (doi:10.1039/d4ta05141f), 2024-11-25
Supplement: d4ta05141f1.pdf [file d4ta05141f1.pdf]

## Supporting information

### **Synchronous Dual Additive to Boost Multiphase Interface Stability of High-voltage Li-rich Mn-based batteries**

*Qiangfeng Zhang, Shijie Xu, Haipeng Zhu, Zhao Chen, Libao Chen, Chunxiao*

*Zhang\*, and Weifeng Wei*

State Key Laboratory of Powder Metallurgy, Central South University, Changsha,  
Hunan, 410083, P. R. China.

E-mail: [chunxiaozhang@csu.edu.cn](mailto:chunxiaozhang@csu.edu.cn) (C. Zhang)

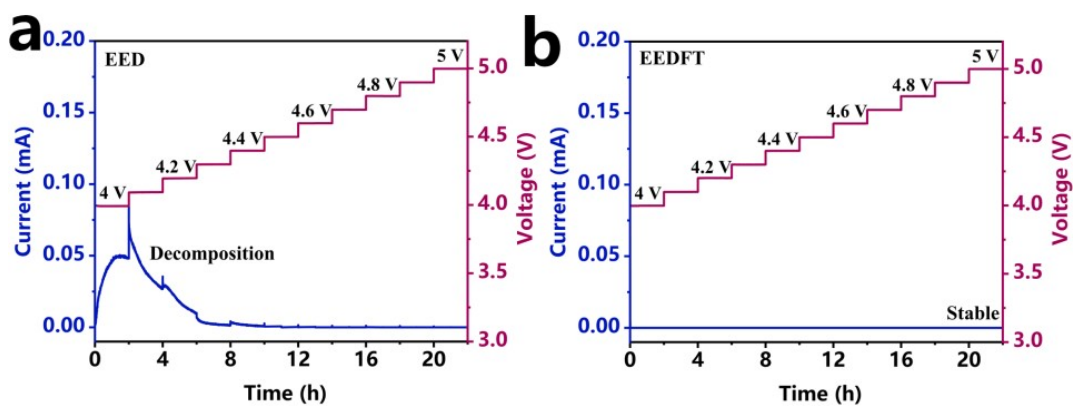

Figure S1. Potentiostatic polarization of Li||Al cells with (a) EED and (b) EEDFT.

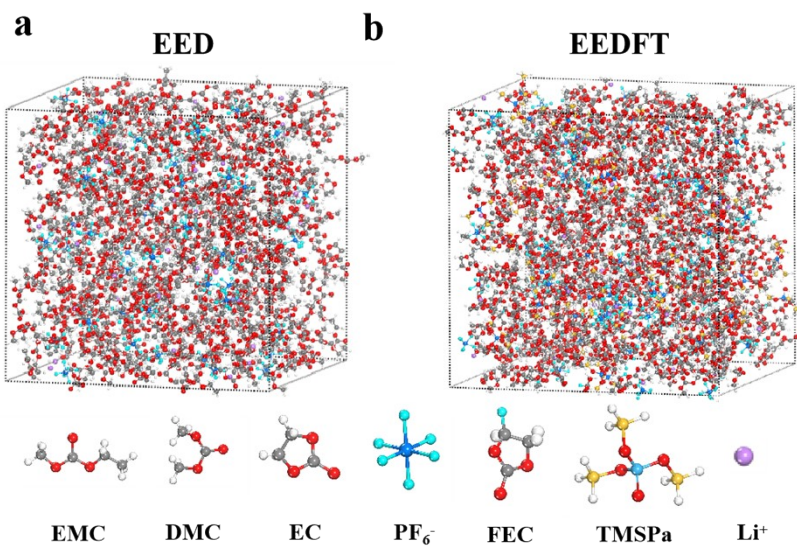

Figure S2. MD simulation snapshots of EED (a) and EEDFT(b)electrolytes.

Table S1. The values of the coordination number in various electrolytes.

| Coordination number | EC   | EMC  | DMC  | PF <sub>6</sub> <sup>-</sup> |
|---------------------|------|------|------|------------------------------|
| EED                 | 1.04 | 1.56 | 2.00 | 0.79                         |
| EEDFT               | 0.90 | 1.17 | 1.83 | 0.62                         |

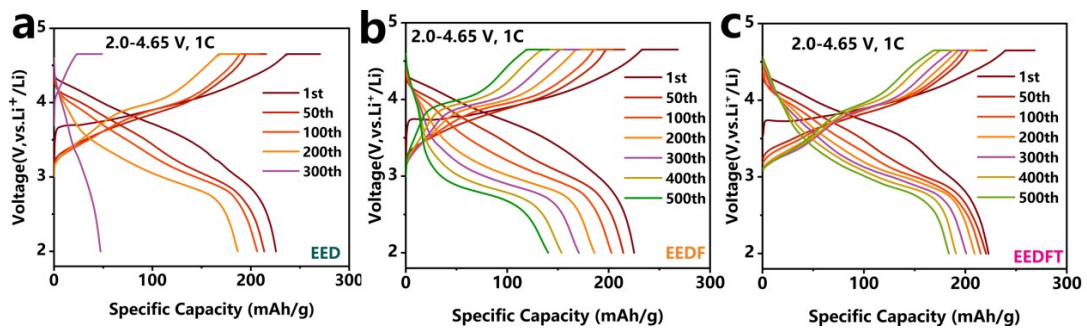

Figure S3. Charge-discharge curves of different cycles using EED electrolyte (a); EEDF electrolyte (b) and EEDFT electrolyte (c).

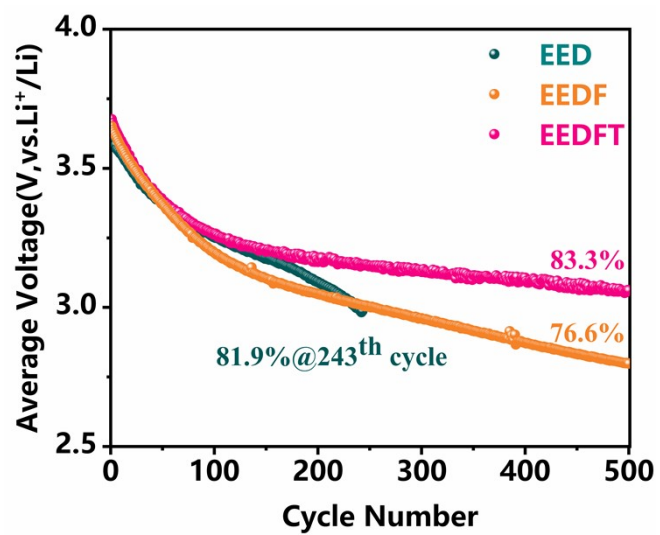

Figure S4. Voltage decay during the cycle at 1 C

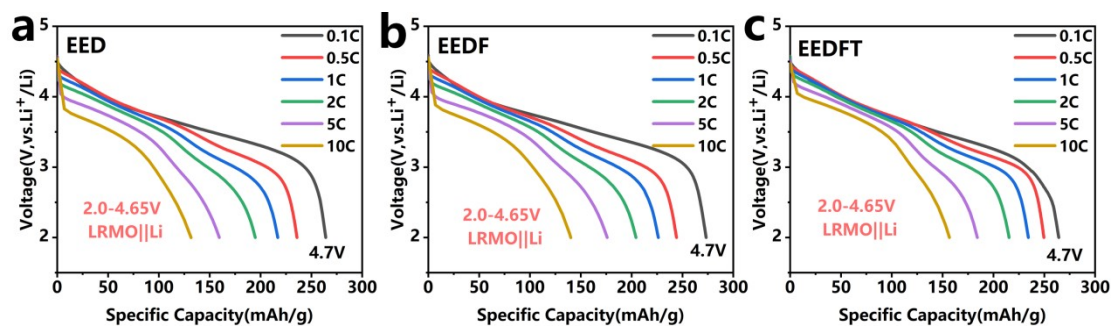

Figure S5. Discharge curves of different current density at 0.1 C-10 C using EED electrolyte (a); EEDF electrolyte (b) and EEDFT electrolyte (c).

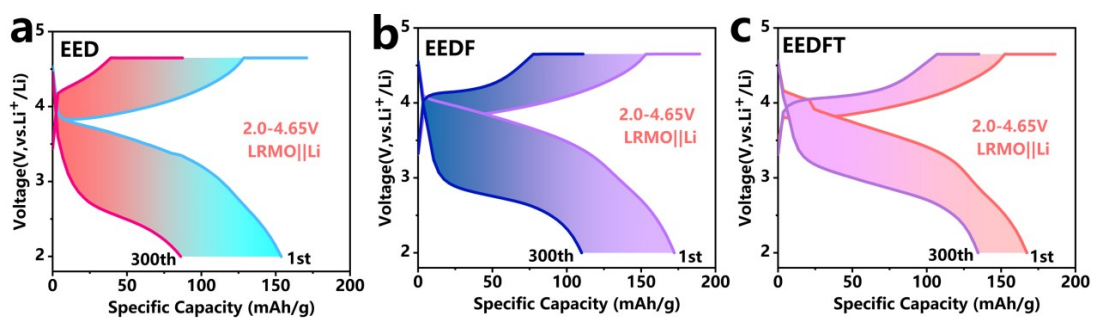

Figure S6. Charge-discharge curves at the high current density of 5 C during cycling using EED electrolyte (a); EEDF electrolyte (b) and EEDFT electrolyte (c).



Table S2. Comparison of the electrochemistry performances of the GPE electrolyte with reported results.

| No. | Electrolyte system                      | Rate  | Cycles | Capacity retention | Ref. |
|-----|-----------------------------------------|-------|--------|--------------------|------|
| 1   | EC/DMC/DEC+FEC                          | 0.5 C | 100    | 93.85%             | [1]  |
| 2   | EC/DMC+LiBOB                            | 0.1 C | 50     | 98%                | [2]  |
| 3   | EC/DMC+LiPO <sub>2</sub> F <sub>2</sub> | 3 C   | 500    | 85%                | [3]  |
| 4   | EC/DMC/EMC+LiDFOB+TMSPi                 | 1 C   | 300    | 87.7%              | [4]  |
| 5   | EC/DMC/EMC+LiDFOB+THFPB                 | 1 C   | 200    | 92.19%             | [5]  |
| 6   | EC/DEC+HTCN+TMSP                        | 1 C   | 200    | 93.83%             | [6]  |
| 7   | EC/EMC/DMC+CFBA                         | 0.5 C | 200    | 88.4%              | [7]  |
| 8   | EC/DMC+TPFPB                            | 1/3 C | 500    | 76.8%              | [8]  |
| 9   | This work                               | 1 C   | 500    | 82.36%             |      |
| 10  | This work                               | 5 C   | 300    | 80.4%              |      |

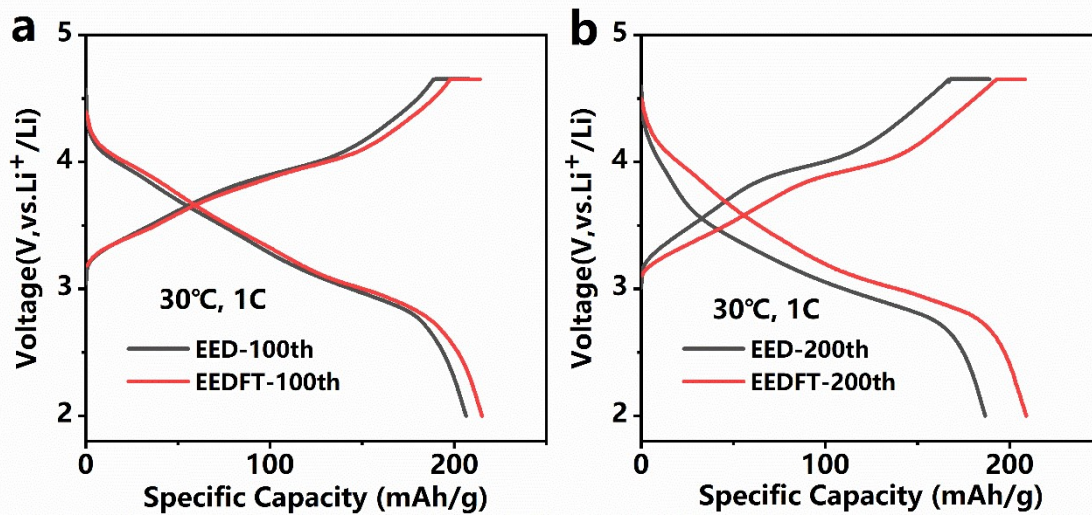

Figure S7. Charge-discharge curves from the 100th (a) to the 200th (b) cycle at 30°C.

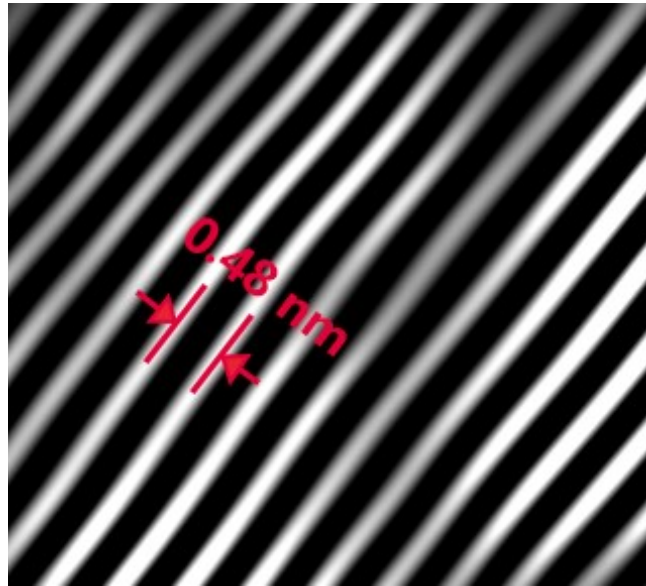

Figure S8. Diffraction fringes obtained by the corresponding inverse Fourier transform in region II.

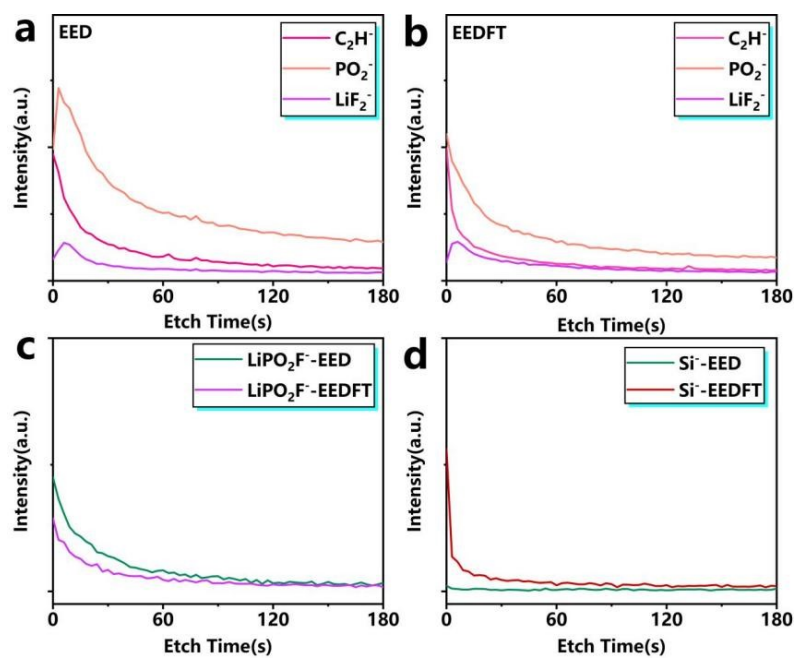

Figure S9. Sputtering profiles of LRMO cathodes with EED electrolyte(a); EEDFT electrolyte (b);  $\text{LiPO}_2\text{F}^-$ (c) and  $\text{Si}^-$ (d) obtained by ToF-SIMS

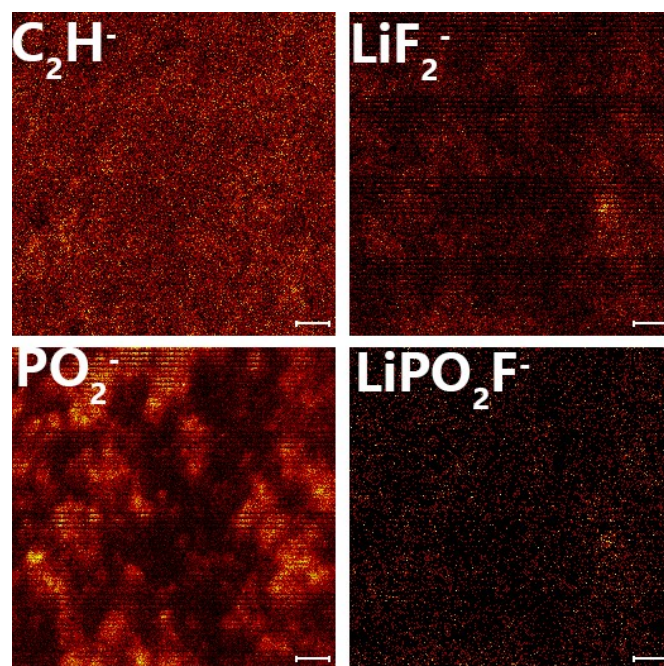

Figure S10. 2D view of LRMO cathodes with EED electrolyte obtained by ToF-SIMS

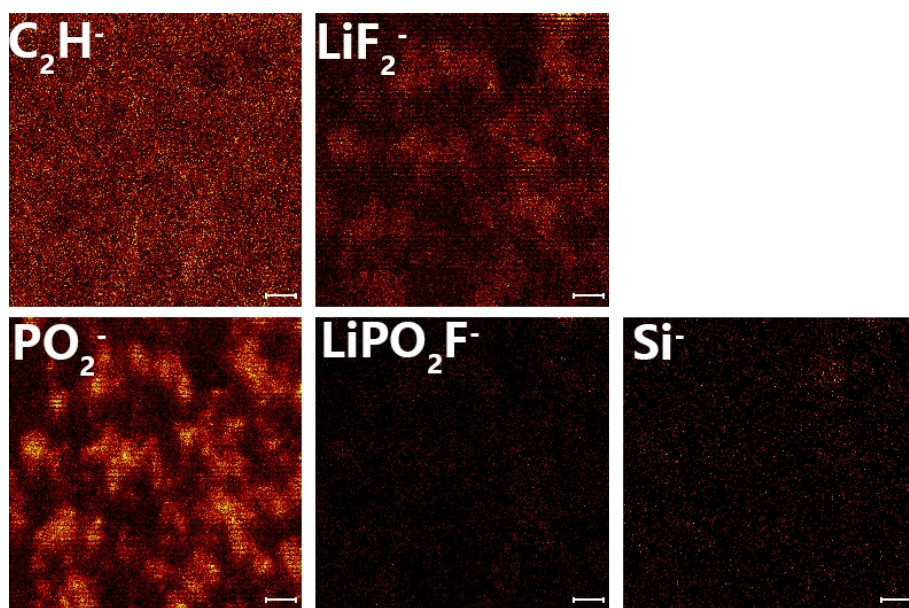

Figure S11. 2D view of LRMO cathodes with EEDFT electrolyte obtained by ToF-SIMS

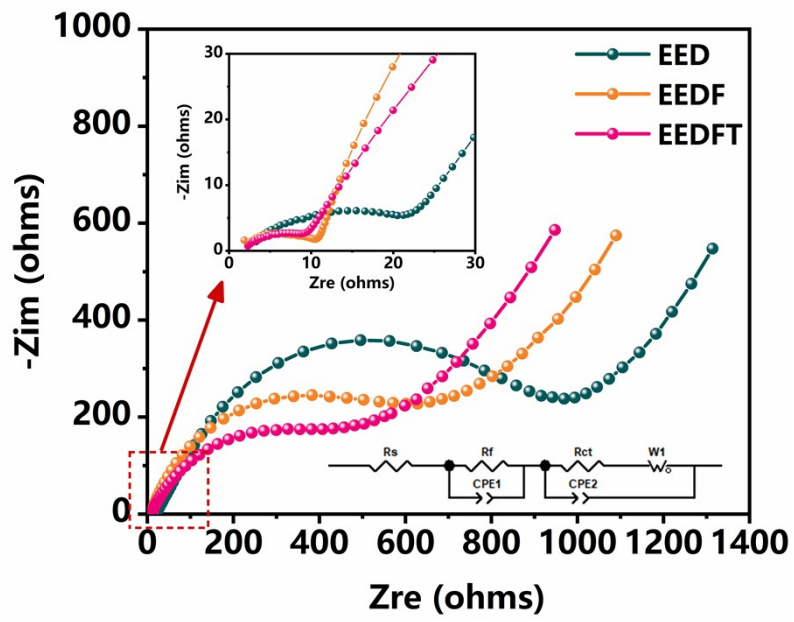

Figure S12. EIS plots of LRMO||Li cells after 30 cycles using various electrolytes.

Table S3.  $R_f$  and  $R_{ct}$  of LRMO||Li cells with different electrolytes after cycled.

| Values of $R_f$ and $R_{ct}$ | EED  | EEDF  | EEDFT |
|------------------------------|------|-------|-------|
| $R_f(\Omega)$                | 21.6 | 9.4   | 7.4   |
| $R_{ct}(\Omega)$             | 1032 | 439.3 | 368.5 |



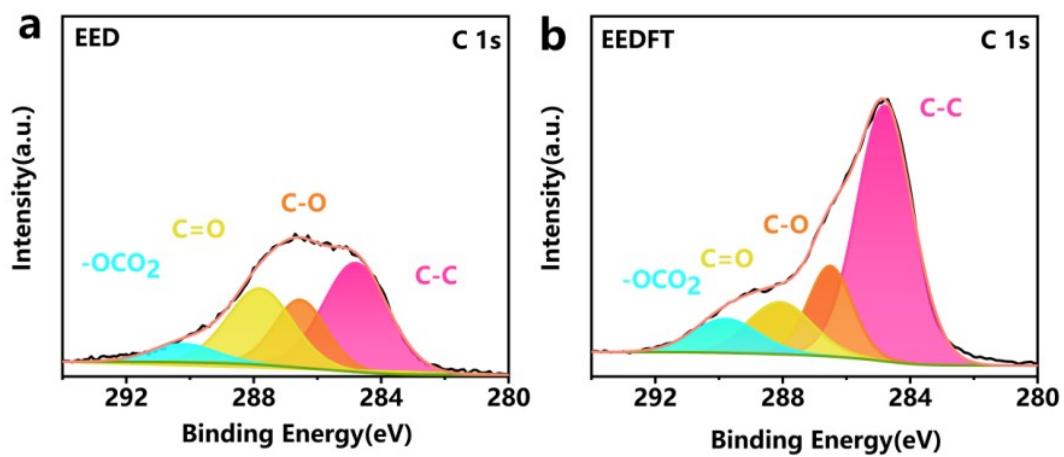

Figure S13. C 1s XPS spectra of the SEI formed on the lithium metal anode after 100 cycles in the LRMO||Li cells with EED (a) and EEDFT (b).

## References:

1. Y. Li, F. Lian, L. Ma, C. Liu, L. Yang, X. Sun and K. Chou, *Electrochimica Acta*, 2015, **168**, 261-270.
2. P. K. Nayak, J. Grinblat, M. Levi and D. Aurbach, *Journal of The Electrochemical Society*, 2015, **162**, A596.
3. B. Jiang, J. Li, B. Luo, Q. Yan, H. Li, L. Liu, L. Chu, Y. Li, Q. Zhang and M. Li, *Journal of Energy Chemistry*, 2021, **60**, 564-571.
4. Z. Lu, D. Liu, K. Dai, K. Liu, C. Jing, W. He, W. Wang, C. Zhang and W. Wei, *Energy Storage Materials*, 2023, **57**, 316-325.
5. K. Ma, Y. Cao, S. Zhang, Y. Zhang, S. Fang, X. Han, F. Jin and J. Sun, *Nano Letters*, 2024, **24**, 8826-8833.
6. J. Zhao, Y. Liang, X. Zhang, Z. Zhang, E. Wang, S. He, B. Wang, Z. Han, J. Lu, K. Amine and H. Yu, *Advanced Functional Materials*, 2021, **31**, 2009192.
7. S. Gu, Y. Cui, K. Wen, S. Chen and J. Zhao, *Journal of Alloys and Compounds*, 2020, **829**, 154491.
8. J. Zheng, J. Xiao, M. Gu, P. Zuo, C. Wang and J.-G. Zhang, *Journal of Power Sources*, 2014, **250**, 313-318.
